# Supplementary material for: proBDNF is modified by advanced glycation end products in Alzheimer’s disease and causes neuronal apoptosis by inducing p75 neurotrophin receptor processing
Source: Springer Nature journal article supplement (doi:10.1186/s13041-018-0411-6), 2018-11-14

**Figure S1** NSCs in culture express p75NTR, sortilin, DCX and SV2.

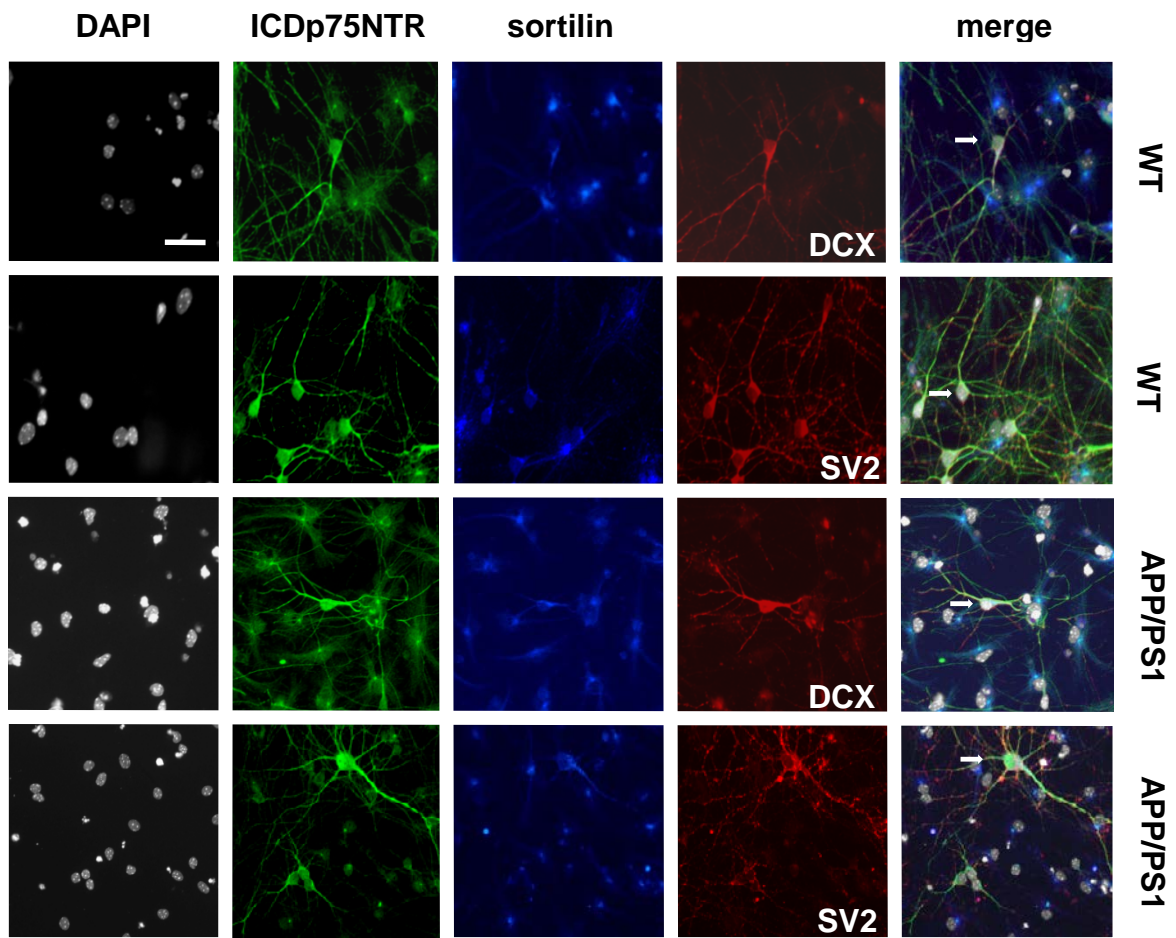

**Figure S2** NSCs in culture expressing DCX and SV2, are positives for TrkB

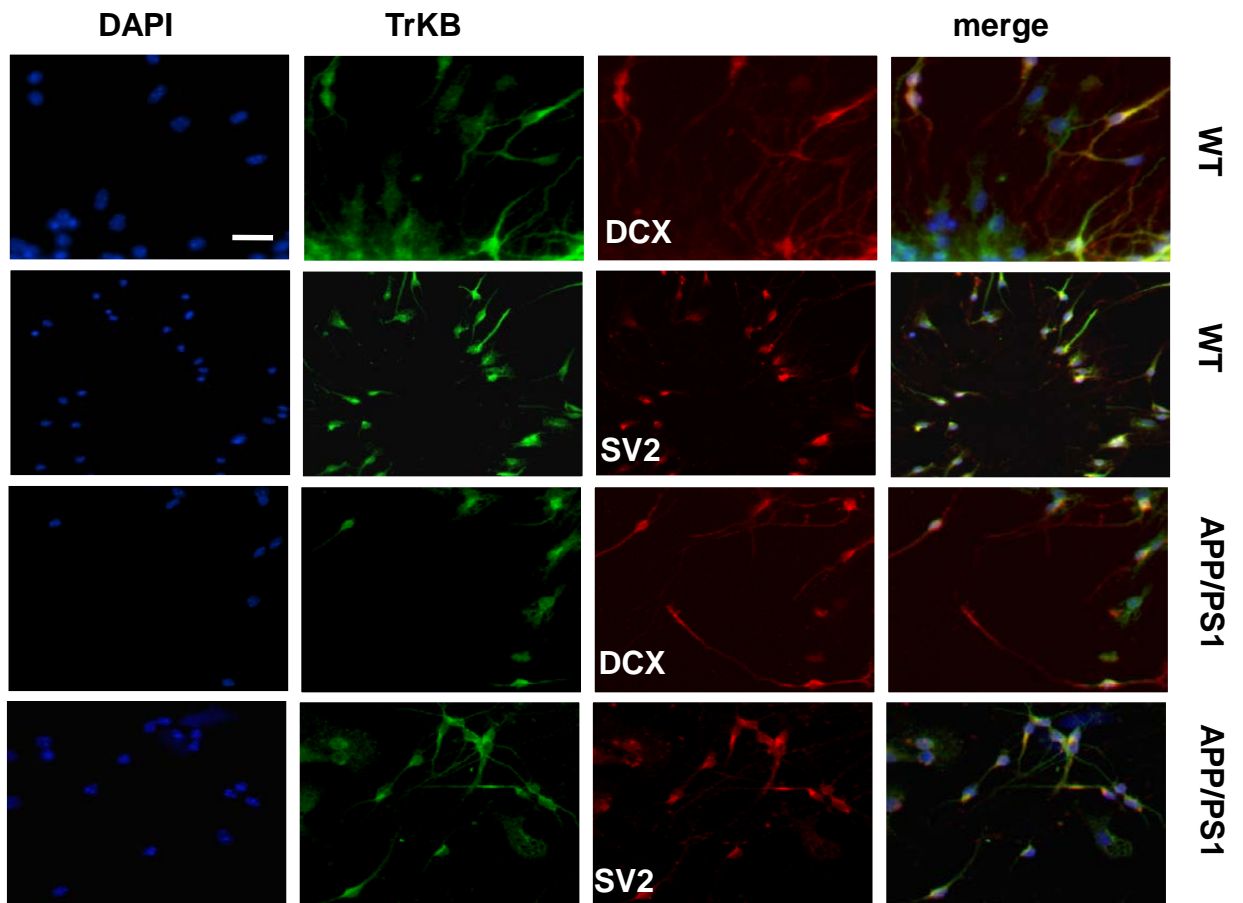

**Figure S3** Characterization of Adult NSCs in culture.

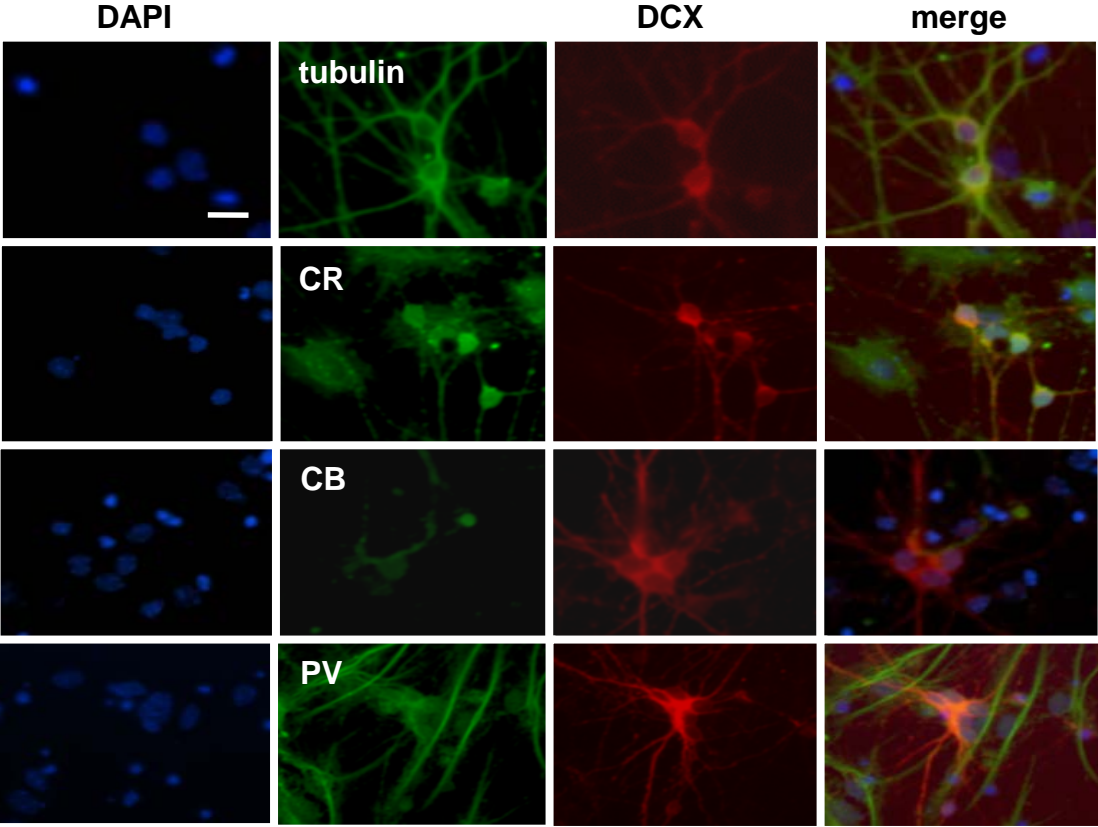

**Figure S4** IDC p75NTR cellular distribution in NSC.

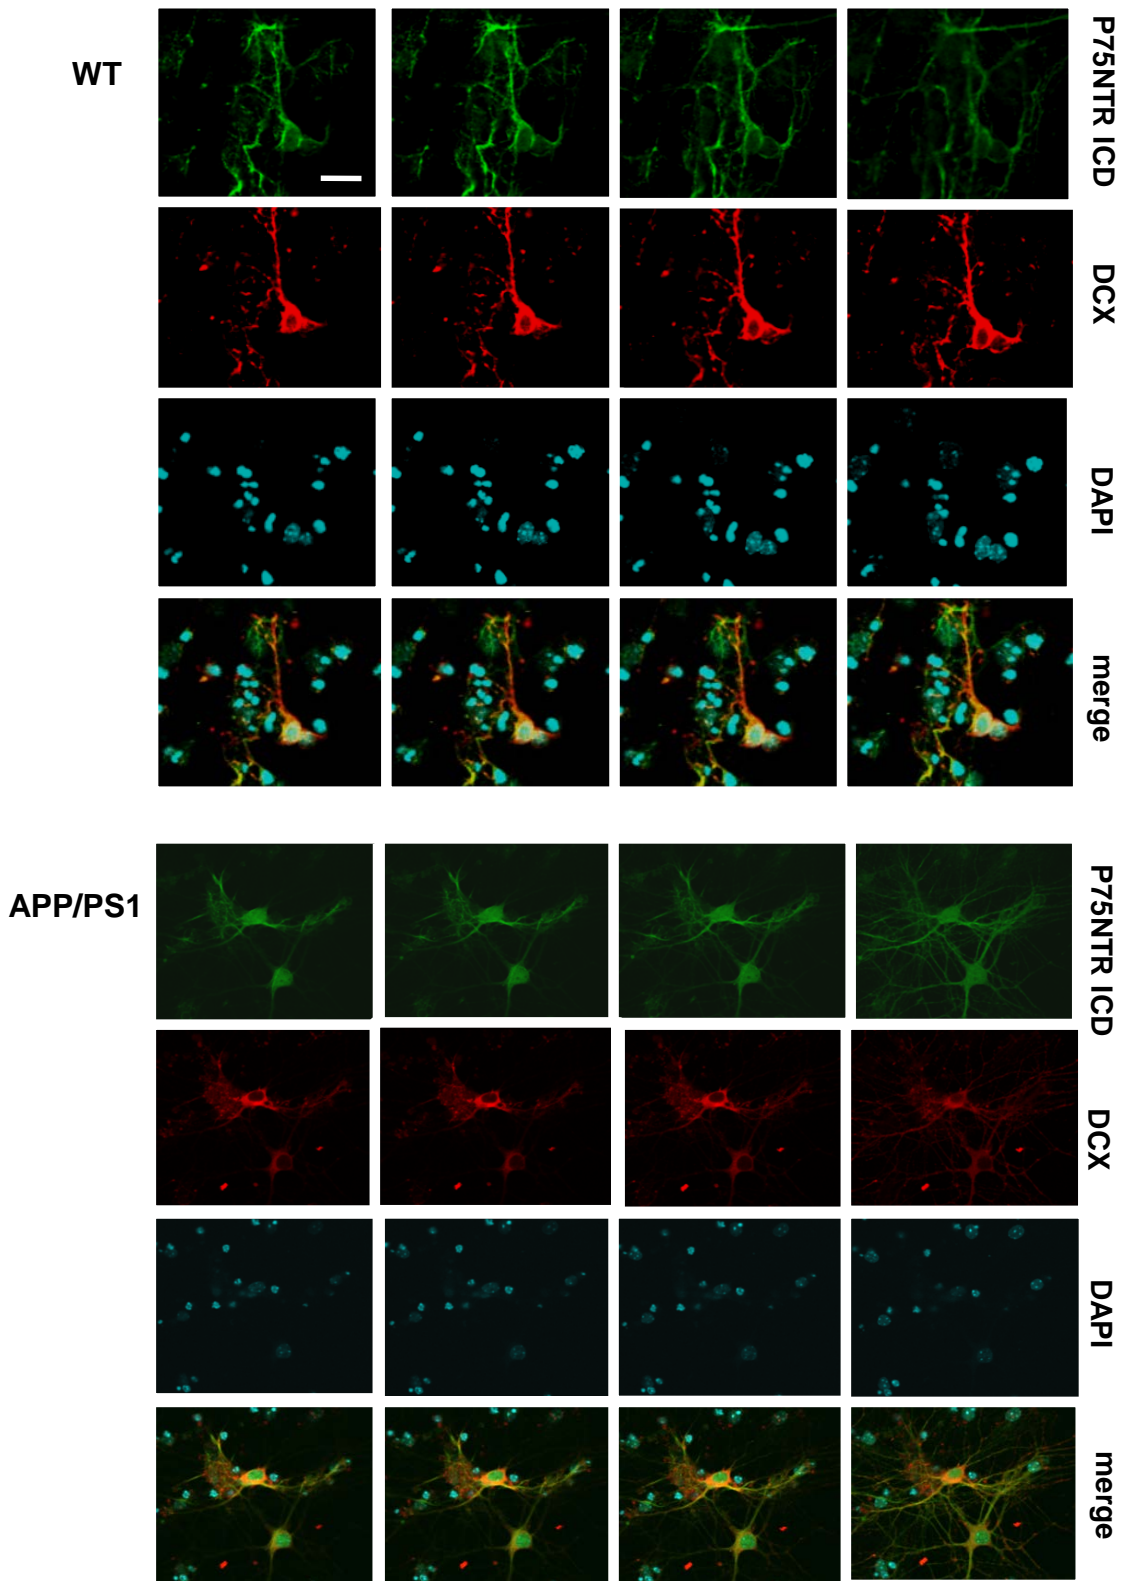

Supplement: MOESM1 [file 25663598]
